# Supplementary material for: Effect of Systemic Steroid Use for Immune-Related Adverse Events in Patients with Non-Small Cell Lung Cancer Receiving PD-1 Blockade Drugs
Source: MDPI journal article supplement (doi:10.3390/jcm10163744), 2021-08-23
Supplement: s1 [file s1]

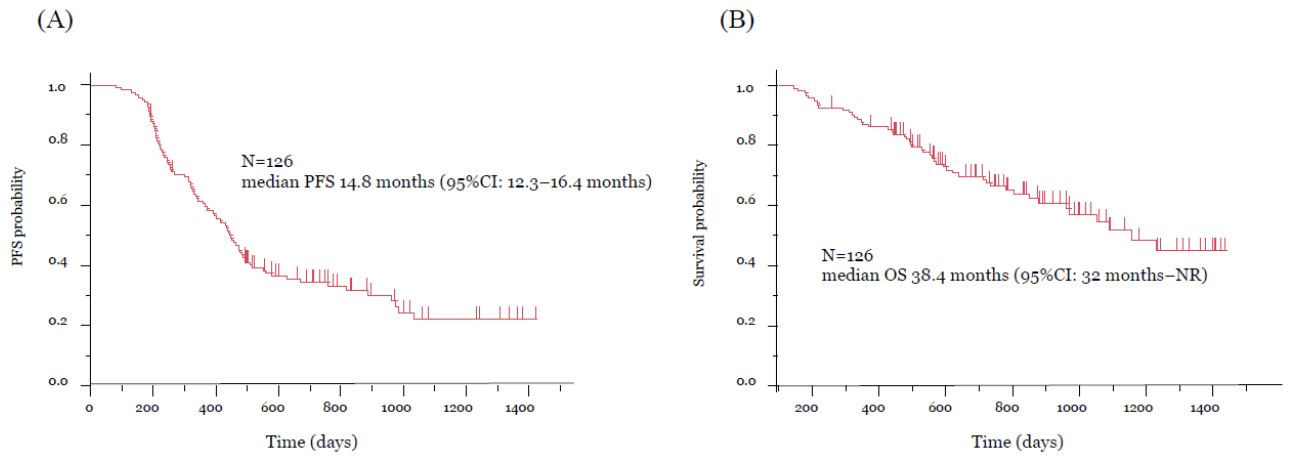

**Figure S1.** Kaplan–Meier survival analysis in all target patients defined as responders. The figures show Kaplan–Meier curves for PFS (S1A) and OS (S1B) in all target patients defined as responders. PFS, progression-free survival; OS, overall survival; NR, not reached.
